# Supplementary material for: Extracorporeal Shock Wave Therapy Combined with Complex Decongestive Therapy in Patients with Breast Cancer-Related Lymphedema: A Systemic Review and Meta-Analysis
Source: MDPI journal article supplement (doi:10.3390/jcm10245970), 2021-12-19
Supplement: s1 [file s1]

**Table S1.** Search strategy.

|                                                                                                                                                                                                                                                                                                                                                                                                                           |
|---------------------------------------------------------------------------------------------------------------------------------------------------------------------------------------------------------------------------------------------------------------------------------------------------------------------------------------------------------------------------------------------------------------------------|
| <p><b>Appendix 1a. PubMed</b><br/> ((((("Extracorporeal Shockwave Therapy"[Mesh]) NOT "Lithotripsy"[Mesh]) AND "Lymphedema"[Mesh]) OR "Non-Filarial Lymphedema"[Mesh]) AND "Breast Neoplasms"[Mesh]) OR "Breast Cancer Lymphedema"[Mesh]</p>                                                                                                                                                                              |
| <p><b>Appendix 1b. PEDro</b><br/> Abstract and Title: shockwave<br/> AND<br/> Problem: lymphedema<br/> AND<br/> Body Part: upper arm, shoulder, or shoulder girdle<br/> AND<br/> Subdiscipline: oncology<br/> AND<br/> Method: clinical trial</p>                                                                                                                                                                         |
| <p><b>Appendix 1c. Embase</b><br/> #1 'breast tumor' AND 'lymphedema therapy': ab,ti AND 'shock wave therapy': ab,ti<br/> #2 'breast tumor' AND 'lymphedema': ab,ti AND 'shock wave therapy': ab,ti<br/> #3 'breast tumor' AND 'lymphedema' AND 'shock wave therapy'<br/> #4 breast AND cancer AND lymphedema AND shockwave<br/> #5 #1 AND #2 AND #3 AND #4<br/> #6 'breast cancer' AND lymphedema AND shock AND wave</p> |
| <p><b>Appendix 1d. Cochrane Library Databases</b><br/> Title Abstract Keywords:<br/> #1 shockwave AND lymphedema AND breast cancer<br/> #2 ESWT AND lymphedema AND breast cancer<br/> #3 shockwave AND lymphedema<br/> #4 ESWT AND lymphedema</p>                                                                                                                                                                         |
| <p><b>Appendix 1e. Google Scholar</b><br/> 'ESWT' AND 'lymphedema' AND 'breast cancer'</p>                                                                                                                                                                                                                                                                                                                                |

**Table S2a.** Reasons for exclusion.(n = 13)

| Study                  | Decision in manuscript                  | Additional notes                                                                                                      |
|------------------------|-----------------------------------------|-----------------------------------------------------------------------------------------------------------------------|
| Kim et al. 2015        | Case report/serials                     | Computed tomography as an objective measurement tool for secondary lymphedema in two patients                         |
| Ha et al. 2021         | Case report/serials                     | Case report in Korea                                                                                                  |
| Michelini et al. 2007  | Lymphedema not related to breast cancer | ESWT on secondary lymphedema                                                                                          |
| Michelini et al. 2010  | Lymphedema not related to breast cancer | ESWT on geriatrics lymphedema                                                                                         |
| Kim et al. 2013        | Pre-clinical study                      | Animal study (mouse)                                                                                                  |
| Rohringer et al. 2014  | Pre-clinical study                      | Molecular and cellular effects of shockwave treatment on in vitro lymphatic endothelial cells                         |
| Schauppper et al. 2016 | Pre-clinical study                      | Preclinical review of lymphatic vessels in regenerative medicine and tissue engineering                               |
| Alderfer et al. 2018   | Pre-clinical study                      | Preclinical review of lymphatic tissue engineering and regeneration                                                   |
| Asaad et al. 2021      | Pre-clinical study                      | Preclinical review of tissue engineering strategies for Cancer-Related Lymphedema                                     |
| Cho et al. 2021        | Pre-clinical study                      | Animal study (rat)                                                                                                    |
| Miccinilli et al. 2020 | Literature review                       | A literature review for ESWT on BCRL                                                                                  |
| Konrad et al. 2021     | Literature review                       | Narrative review of in vitro, animal, and clinical studies                                                            |
| Bae et al. 2013        | Inappropriate study design              | Outcomes of ESWT group and ESWT+CDT group were calculated together; outcome measurement like this was not appropriate |

Abbreviations: ESWT: Extracorporeal Shock Wave Therapy; BCRL: Breast-Cancer-Related Lymphedema; CDT: Complex Decongestive Therapy.

**Table S2b.** Reference of excluded studies.(n = 13)

1. Kim, S.Y.; Bae, H.; Ji, H.M. Computed Tomography as an Objective Measurement Tool for Secondary Lymphedema Treated With Extracorporeal Shock Wave Therapy. *Ann. Rehabil. Med.* **2015**, *39*, 488-493.
2. Ha, M.C.; Shin, J.C.; Jung, Y.S.; Im, S.H. Feasibility of Extracorporeal Shock Wave Therapy for Complex Upper Limb Morbidity in Breast Cancer Patient. *Clin. Pain.* **2021**, *20*, 25-29.
3. Michelini, S.; Failla, A.; Moneta, G.; Zinicola, V.; Macaluso, B.; Cardone, M.; Antonucci, D. Treatment of lymphedema with shockwave therapy: preliminary study. *Eur. J. Lymphology Relat. Probl.* **2007**, *17*, 29.
4. Michelini, S.; Cardone, M.; Failla, A.; Moneta, G.; Fiorentino, A.; Cappellino, F. Treatment of geriatrics lymphedema with shockwave therapy. *BMC Geriatrics.* **2010**;10(Suppl 1):A105.
5. Kim, I.G.; Lee, J.Y.; Lee, D.S.; Kwon, J.Y.; Hwang, J.H. Extracorporeal shock wave therapy combined with vascular endothelial growth factor-C hydrogel for lymphangiogenesis. *J. Vasc. Res.* **2013**, *50*, 124-133.
6. Rohringer, S.; Holnthoner, W.; Hackl, M.; Weihs, A.M.; Rünzler, D.; Skalicky, S.; Karbiener, M.; Scheideler, M.; Pröll, J.; Gabriel, C.; Schweighofer, B.; Gröger, M.; Spittler, A.; Grillari, J.; Redl, H. Molecular and cellular effects of in vitro shockwave treatment on lymphatic endothelial cells. *PLoS One.* **2014**, *9*, e114806.
7. Schaupper, M.; Jeltsch, M.; Rohringer, S.; Redl, H.; Holnthoner, W. Lymphatic Vessels in Regenerative Medicine and Tissue Engineering. *Tissue Eng. Part B Rev.* **2016**, *22*, 395-407.
8. Alderfer, L.; Wei, A.; Hanjaya-Putra, D. Lymphatic Tissue Engineering and Regeneration. *J. Biol. Eng.* **2018**, *12*, 32.
9. Asaad, M.; Hanson, S.E. Tissue Engineering Strategies for Cancer-Related Lymphedema. *Tissue Eng. Part A.* **2021**, *27*, 489-499.
10. Cho, H.K.; Sung, W.J.; Lee, Y.J.; Kwak, S.G.; Kim, K.L. Two methods of extracorporeal shock-wave therapy in a rat model of secondary lymphedema: A pilot study. *J. Int. Med. Res.* **2021**, *49*, 3000605211024473.
11. Miccinilli, S.; Bravi, M.; Maselli, M.; Santacaterina, F.; Morrone, M.; Manco, D.; Togli, R.; Sterzi, S.; Bressi, F. The effectiveness of extracorporeal shock wave therapy on breast cancer-related lymphedema: A literature review. *Lymphology.* **2020**, *53*, 118-135.
12. Konrad, J.; Grygiel, M. Extracorporeal shock wave therapy as a potential therapeutic tool for breast cancer related lymphedema: A narrative review of intro, animal and clinical studies. *Med. Sci. Pulse.* **2021**, *15*, 66-73.

13. Bae, H.; Kim, H.J. Clinical outcomes of extracorporeal shock wave therapy in patients with secondary lymphedema: A pilot study. *Ann. Rehabil. Med.* **2013**, *37*, 229-234.

**Table S3.** Studies and methodological quality description according to the PEDro Scale Score.

| Study                       | Random allocation | Concealed allocation | Groups similar at baseline | Participant blinding | Therapist blinding | Assessor blinding | < 15% dropouts | Intention -to-treat analysis | Between-group difference reported | Point estimate and variability reported | Total (0 to 10) |
|-----------------------------|-------------------|----------------------|----------------------------|----------------------|--------------------|-------------------|----------------|------------------------------|-----------------------------------|-----------------------------------------|-----------------|
| Mahran et al. 2015 [38]     | Y                 | N                    | Y                          | N                    | N                  | N                 | N              | N                            | Y                                 | Y                                       | 4               |
| El-Shazly et al. 2016 [39]  | Y                 | N                    | Y                          | N                    | N                  | N                 | N              | N                            | Y                                 | Y                                       | 4               |
| El-Shazly et al. 2016 [40]  | Y                 | N                    | Y                          | N                    | N                  | N                 | N              | N                            | Y                                 | Y                                       | 4               |
| Abdelhalim et al. 2018 [41] | Y                 | Y                    | Y                          | N                    | N                  | Y                 | Y              | N                            | Y                                 | Y                                       | 7               |
| Lee et al. 2020 [42]        | Y                 | N                    | Y                          | N                    | N                  | N                 | Y              | Y                            | Y                                 | Y                                       | 6               |
| Cebicci et al. 2021 [43]    | Y                 | Y                    | Y                          | N                    | N                  | N                 | N              | N                            | Y                                 | Y                                       | 5               |

**Table S4.** Studies and methodological quality description according to the Modified Jadad Scale with eight items.

| Study                                                              | Mahran et al.<br>2015 [38] | El-Shazly et al.<br>2016 [39] | El-Shazly et al.<br>2016 [40] | Abdelhalim<br>et al. 2018 [41] | Lee et al.<br>2020 [42] | Cebicci et al.<br>2021 [43] |
|--------------------------------------------------------------------|----------------------------|-------------------------------|-------------------------------|--------------------------------|-------------------------|-----------------------------|
| Was the study described as randomized?                             | Yes                        | Yes                           | Yes                           | Yes                            | Yes                     | Yes                         |
| Was the method of randomization appropriate?                       | Not described              | Not described                 | Not described                 | Yes                            | Not described           | Yes                         |
| Was the study described as blinded?                                | No                         | No                            | No                            | Yes <sup>a</sup>               | No                      | No                          |
| Was the method of blinding appropriate?                            | No                         | No                            | No                            | Yes                            | No                      | No                          |
| Was there a description of withdrawals and dropouts?               | No                         | No                            | No                            | Yes                            | Yes                     | Yes                         |
| Was there a clear description of the inclusion/exclusion criteria? | Yes                        | Yes                           | Yes                           | Yes                            | Yes                     | Yes                         |
| Was the method used to assess adverse effects described?           | No                         | No                            | No                            | No                             | Yes                     | No                          |
| Was the method of statistical analysis described?                  | Yes                        | Yes                           | Yes                           | Yes                            | Yes                     | Yes                         |
| Total                                                              | 3                          | 3                             | 3                             | 6.5                            | 5                       | 5                           |

<sup>a</sup> Single-blind.

**Table S5.** Summary of quality assessment (using STROBE assessment tools) of the included articles.

| Report section                            | Item                       |     | Cebicci et al.<br>2016 [27] | Joos et al.<br>2020 [44] |
|-------------------------------------------|----------------------------|-----|-----------------------------|--------------------------|
| <b>Title and abstract</b>                 | Title                      | 1a  | Y                           | Y                        |
|                                           | Abstract                   | 1b  | Y                           | Y                        |
| <b>Introduction</b>                       | Background/rationale       | 2   | Y                           | Y                        |
|                                           | Objective                  | 3   | N                           | Y                        |
| <b>Methods</b>                            | Study design               | 4   | Y                           | Y                        |
|                                           | Setting(location + dates)  | 5   | Y                           | N                        |
|                                           | Participants               | 6a  | Y                           | Y                        |
|                                           |                            | 6b  | N/A <sup>a</sup>            | N/A <sup>a</sup>         |
|                                           | Variables                  | 7   | Y                           | Y                        |
|                                           | Data (sources/measurement) | 8   | Y                           | Y                        |
|                                           | Bias                       | 9   | N                           | N                        |
|                                           | Study size                 | 10  | N                           | N                        |
|                                           | Quantitative variables     | 11  | Y                           | Y                        |
|                                           | Statistical methods        | 12a | Y                           | Y                        |
|                                           |                            | 12b | N                           | N                        |
|                                           |                            | 12c | N                           | N                        |
|                                           |                            | 12d | N                           | N                        |
|                                           |                            | 12e | N                           | N                        |
| <b>Results</b>                            | Participants               | 13a | Y                           | Y                        |
|                                           |                            | 13b | Y <sup>b</sup>              | Y                        |
|                                           |                            | 13c | Y                           | N                        |
|                                           | Descriptive data           | 14a | Y                           | Y                        |
|                                           |                            | 14b | Y <sup>b</sup>              | N                        |
|                                           |                            | 14c | Y                           | Y                        |
|                                           | Outcome data               | 15  | Y                           | Y                        |
|                                           | Main results               | 16a | N                           | Y                        |
|                                           |                            | 16b | N/A <sup>a</sup>            | N/A <sup>a</sup>         |
|                                           |                            | 16c | N                           | N                        |
|                                           | Other analyses             | 17  | N                           | N                        |
| <b>Discussion</b>                         | Key results                | 18  | Y                           | Y                        |
|                                           | Limitations                | 19  | Y                           | Y                        |
|                                           | Interpretation             | 20  | Y                           | Y                        |
|                                           | Generalisability           | 21  | Y                           | Y                        |
| <b>Other</b>                              | Funding                    | 22  | N                           | Y                        |
| <b>Total percentage for all sub-items</b> |                            |     | 65.6%(21/32)                | 65.6%(21/32)             |

Abbreviations: STROBE: Strengthening the Reporting of Observational studies in Epidemiology;

N/A: Not Assessed; %: Percentage.

<sup>a</sup> N/A was not calculated for percentage.

<sup>b</sup> No patients withdrew from this study.

**Table S6.** Appraisal of included studies, using the GRADE tool.

| Quality assessment                                                    |        |                      |                          |                         |                      |                                                                      | Quality of evidence |
|-----------------------------------------------------------------------|--------|----------------------|--------------------------|-------------------------|----------------------|----------------------------------------------------------------------|---------------------|
| No. of studies                                                        | Design | Risk of bias         | Inconsistency            | Indirectness            | Imprecision          | Other considerations                                                 |                     |
| Volume of lymphedema <sup>a</sup> (ESWT combined with CDT versus CDT) |        |                      |                          |                         |                      |                                                                      |                     |
| 2<br>(70 patients)                                                    | RCT    | Serious <sup>b</sup> | No serious inconsistency | No serious indirectness | Serious <sup>c</sup> | Publication bias <sup>d</sup><br>Intervention variatone <sup>e</sup> | ⊖○○○<br>Very low    |
| Skin thickness difference(ESWT combined with CDT versus CDT)          |        |                      |                          |                         |                      |                                                                      |                     |
| 2<br>(73 patients)                                                    | RCT    | Serious <sup>b</sup> | No serious inconsistency | No serious indirectness | Serious <sup>c</sup> | Publication bias <sup>d</sup><br>Intervention variatone <sup>e</sup> | ⊖○○○<br>Very low    |
| Range of motion – shoulder (ESWT combined with CDT versus CDT)        |        |                      |                          |                         |                      |                                                                      |                     |
| 2<br>(100 patients)                                                   | RCT    | Serious <sup>b</sup> | No serious inconsistency | No serious indirectness | Serious <sup>c</sup> | Publication bias <sup>d</sup><br>Intervention variatone <sup>e</sup> | ⊖○○○<br>Very low    |

<sup>a</sup> Volume of the lymphedema was measured by the water-displacement method; the volume difference between the affected limb and healthy limb was calculated.

<sup>b</sup> Some studies had a high risk of bias due to their methodology.

<sup>c</sup> Studies with a small sample size.

<sup>d</sup> Only two studies meet the criteria for analysis.

<sup>e</sup> Type of Extracorporeal Shock Wave Therapy and therapeutic sessions varied across studies.

<sup>f</sup> Difference of the skin thickness was measured at 7cm below the elbow in the study of Abdelhalim et al. [41] and at 10cm below the elbow in the study of Lee et al. [42].

<sup>g</sup> I<sup>2</sup> = 86%, considerable heterogeneity.

<sup>h</sup> I<sup>2</sup> = 84%, considerable heterogeneity.

Abbreviations: GRADE: The Grading of Recommendations Assessment, Development and Evaluation; No.: number;

ESWT: Extracorporeal Shock Wave Therapy; CDT: Complex Decongestive Therapy; RCT: Randomized Control Trial.

**Table S7.** Skin thickness difference measurement of included studies.

| Study                                  | No. of patients         | Measurement                         | Difference of the skin thickness<br>(mean±SD, mm) |                   | Intragroup<br>difference | Intergroup<br>difference |
|----------------------------------------|-------------------------|-------------------------------------|---------------------------------------------------|-------------------|--------------------------|--------------------------|
|                                        |                         |                                     | Baseline                                          | Post-intervention |                          |                          |
| El-Shazly et al.<br>2016 (Egypt) [40]  | ESWT+CDT: 30<br>CDT: 30 | Sonography<br>(most fibrotic point) | 2.31±0.55                                         | 1.79±0.46         | Yes                      | Yes                      |
|                                        |                         |                                     | 2.33±0.57                                         | 2.3±0.59          | No                       |                          |
| Abdelhalim et al.<br>2018 (Egypt) [41] | ESWT+CDT: 21<br>CDT: 22 | Skinfold caliper <sup>a</sup>       | 22.81±1.12                                        | 16.43±3.11        | Yes                      | Yes                      |
|                                        |                         |                                     | 23.05±1.00                                        | 18.50±2.87        | Yes                      |                          |
| Lee et al. 2020<br>(South Korea) [42]  | ESWT+CDT: 15<br>CDT: 15 | Skinfold caliper <sup>a</sup>       | 31.14±2.91                                        | 29.85±3.09        | Yes                      | Yes                      |
|                                        |                         |                                     | 30.15±7.40                                        | 29.54±6.98        | No                       |                          |

<sup>a</sup> Difference of the skin thickness was measured at 7cm below the elbow in studies of Abdelhalim et al. [41] and Bae et al. [26], and at 10cm below the elbow in study of Lee et al. [42].

Abbreviations: No.: number; SD: Standard Deviation; mm: millimeter; ESWT: Extracorporeal Shock Wave Therapy;  
CDT: Complex Decongestive Therapy.

**Table S8.** ROM measurement of included studies.

| Study                                 | No. of patients | Flexion (mean±SD, degree) |                   | Abd (mean±SD, degree) |                   | ER (mean±SD, degree) |                   |
|---------------------------------------|-----------------|---------------------------|-------------------|-----------------------|-------------------|----------------------|-------------------|
|                                       |                 | Baseline                  | Post-intervention | Baseline              | Post-intervention | Baseline             | Post-intervention |
| Mahran et al.<br>2015 (Egypt) [38]    | ESWT+CDT: 20    | 154.7±9.87                | 174.44±6.70       | 160.2±7.37            | 178.0±5.88        | 72.1±3.68            | 85.9±2.23         |
|                                       | CDT: 20         | 156.9±6.70                | 166.80±6.66       | 162.2±6.00            | 172.9±4.65        | 71.9±4.86            | 82.2±3.85         |
| El-Shazly et al.<br>2016 (Egypt) [39] | ESWT+CDT: 30    | 95.12±7.81                | 120.44±13.07      | 82.13±11.20           | 114.10±14.62      | 31.51±3.68           | 42.93±5.04        |
|                                       | CDT: 30         | 97.30±11.60               | 111.83±13.91      | 80.80±12.38           | 97.66±15.70       | 30.30±5.12           | 35.20±4.62        |

Abbreviations: ROM: Range Of Motion; No.: number; SD: Standard Deviation; Abd: Abduction; ER: External Rotation;  
ESWT: Extracorporeal Shock Wave Therapy; CDT: Complex Decongestive Therapy.

**Table S9.** Arm circumference measurement of included studies.

| Study                               | No. of patients | Upper arm (cm) |         | Elbow (cm) |         | Forearm (cm) |         | Wrist (cm) |         |
|-------------------------------------|-----------------|----------------|---------|------------|---------|--------------|---------|------------|---------|
|                                     |                 | Baseline       | Post Tx | Baseline   | Post Tx | Baseline     | Post Tx | Baseline   | Post Tx |
| Abdelhalim et al. 2018 (Egypt) [41] | ESWT+CDT: 30    | 6.405          | 4.2     | N/A        | N/A     | 6.165        | 2.3445  | N/A        | N/A     |
|                                     | CDT: 30         | 6.76           | 6.725   | N/A        | N/A     | 5.79         | 4.885   | N/A        | N/A     |
| Lee et al. 2020 (South Korea) [42]  | ESWT+CDT: 15    | 28.17          | 27.14   | 25.94      | 25.63   | 26.28        | 25.50   | 16.21      | 16.00   |
|                                     | CDT: 15         | 26.81          | 25.55   | 24.44      | 24.04   | 25.80        | 25.40   | 16.70      | 16.55   |
| Cebicci et al. 2021 (Turkey) [43]   | ESWT: 10        | 3.4            | 2.7     | N/A        | N/A     | 3.7          | 2.7     | 1.7        | 1.3     |
|                                     | CDT: 10         | 2.6            | 1.9     | N/A        | N/A     | 3.9          | 2.9     | 1.8        | 1.6     |
| Joos et al. 2020 (Belgium) [44]     | ESWT+CDT: 10    | 32.3           | 31.4    | 29.1       | 28.1    | 27.50        | 26.80   | N/A        | N/A     |

Abdelhalim et al. [41] and Cebicci et al. [43] was calculated the difference of the healthy and affected arm, while Lee et al. [42] and Joos et al. [44] measured the arm circumference of affected side only.

Abbreviations: No.: number; cm: centimeter; Tx: Treatment; ESWT: Extracorporeal Shock Wave Therapy; CDT: Complex Decongestive Therapy; N/A: not available..

**Table S10.** qDASH measurement of included studies.

| Study                                 | No. of patients | qDASH score (±SD) |                   | Intragroup difference | Intergroup difference |
|---------------------------------------|-----------------|-------------------|-------------------|-----------------------|-----------------------|
|                                       |                 | Baseline          | Post-intervention |                       |                       |
| Lee et al. 2020<br>(South Korea) [42] | ESWT+CDT: 15    | 4.25±5.72         | 3.89±4.41         | No                    | No                    |
|                                       | CDT: 15         | 3.15±4.28         | 3.11±3.98         | No                    |                       |
| Cebicci et al. 2021<br>(Turkey) [43]  | ESWT: 10        | 72.4±16.6         | 63.6±14           | Yes                   | Yes                   |
|                                       | CDT: 10         | 74.9±10.1         | 70.7±9.6          | Yes                   |                       |
| Cebicci et al. 2016<br>(Turkey) [27]  | ESWT: 11        | 70.65±N/A         | 62.18±N/A         | Yes                   | N/A                   |

Abbreviations: No.: number; qDASH: quick Disabilities of the Arm, Shoulder, and Hand; SD: Standard Deviation;  
ESWT: Extracorporeal Shock Wave Therapy; CDT: Complex Decongestive Therapy;  
N/A: not available.
